# Supplementary material for: Manipulating room-temperature phosphorescencevialone-pair electrons and empty-orbital arrangements and hydrogen bond adjustment
Source: Royal Society of Chemistry journal article supplement (doi:10.1039/d2tc01089e), 2022-01-01
Supplement: d2tc01089e1.pdf [file d2tc01089e1.pdf]

## Supporting Information

### **Manipulating Room-temperature Phosphorescence via Lone-pair Electrons and Empty-orbital Arrangements and Hydrogen Bonds Adjusting**

*Haodong Sun, Zongliang Xie, Hailan Wang, Wazhang Wu, Beibei Du, Cao Guan,\*  
Tao Yu\**

## 1 Synthesis and Characterization of Compounds

4-Bromobenzophenone, 2-Bromobenzophenone were purchased from Energy-Chemical and were used directly without any further purification. Bis(pinacolato)diboron, potassium acetate ( $\text{CH}_3\text{COOK}$ ), dioxane, 2-methyltetrahydrofuran (2-Me-THF), and [1,1'-bis(diphenylphosphino)-ferrocene]dichloropalladium ( $\text{Pd}(\text{dppf})\text{Cl}_2$ ) were purchased from Sigma-Aldrich. The other reagents were purchased from Aladdin Industrial. The details of the synthetic procedures for the final compounds were listed in the following part. Final compounds were characterized by  $^1\text{H}$  NMR, high performance liquid chromatography (HPLC) and high resolution EI mass spectrometry.

### Synthetic Routes

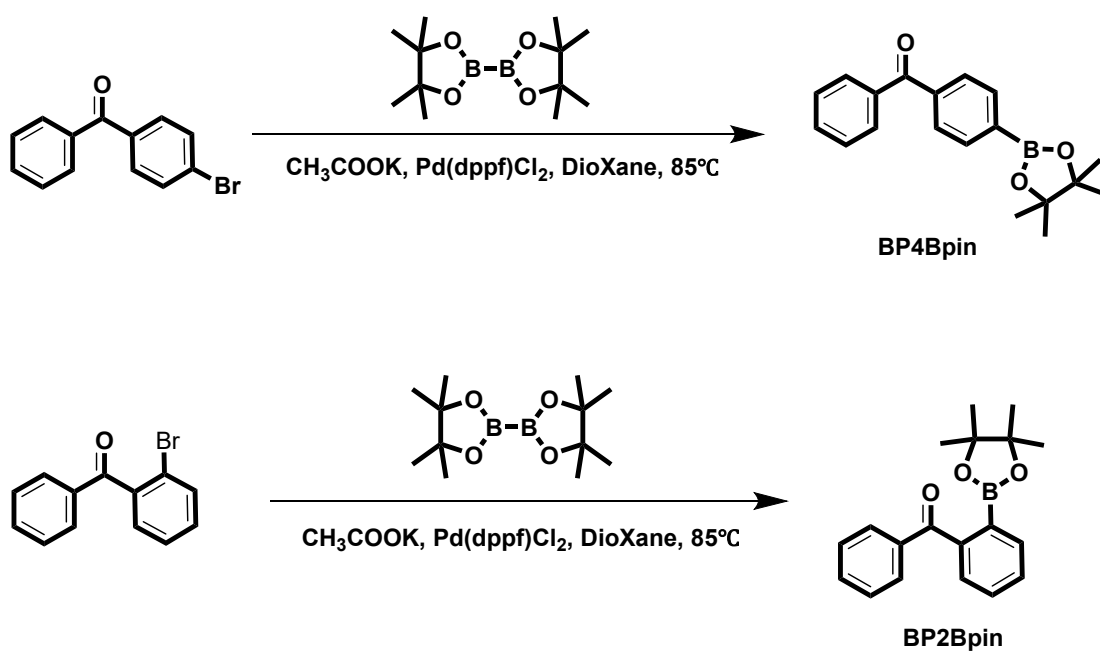

Scheme S1 Synthetic routes for compounds BP4Bpin and BP2Bpin.

## Synthetic Details

### Phenyl(4-(4,4,5,5-tetramethyl-1,3,2-dioxaborolan-2-yl)phenyl)methanone (BP4Bpin)

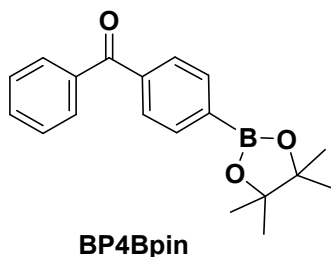

4-Bromobenzophenone (2.00 g, 7.66 mmol), Bis(pinacolato)diboron (3.89 g, 15.32 mmol), potassium acetate (2.63 g, 26.81 mmol), Pd(dppf)Cl<sub>2</sub> (5 %), and recently opened dioxane (40 mL) were mixed in a dried 250 mL flask under argon atmosphere. After refluxing for 24 hours, the reaction mixture was cooled to room temperature. The organic solvent was distilled out, and the residual solid was dissolved in dichloromethane (DCM) and washed with water. After removal of the solvents, the crude products were purified through silica-gel chromatography with n-hexane/Ethylacetate (8/1, v/v) to give BP4Bpin as a white powder (1.58 g, yield: 66.9%). <sup>1</sup>H NMR (500 MHz, CDCl<sub>3</sub>, 298 K), (TMS, ppm): δ = 7.92 (d, J = 8.19 Hz, 2H), 7.76-7.80 (m, 4H), 7.57-7.61 (m, 1H), 7.46-7.49 (t, 2H), 1.37 (s, 12H). <sup>13</sup>C NMR (500 MHz, CDCl<sub>3</sub>, 298 K), (ppm): 24.90, 84.21, 128.30, 129.02, 130.13, 132.53, 135.57, 137.53, 139.79, 196.93. High Resolution EI-MS: m/z found: 308.1579 [M]<sup>+</sup>; calcd for [C<sub>19</sub>H<sub>21</sub>BO<sub>3</sub>]: 308.1584.

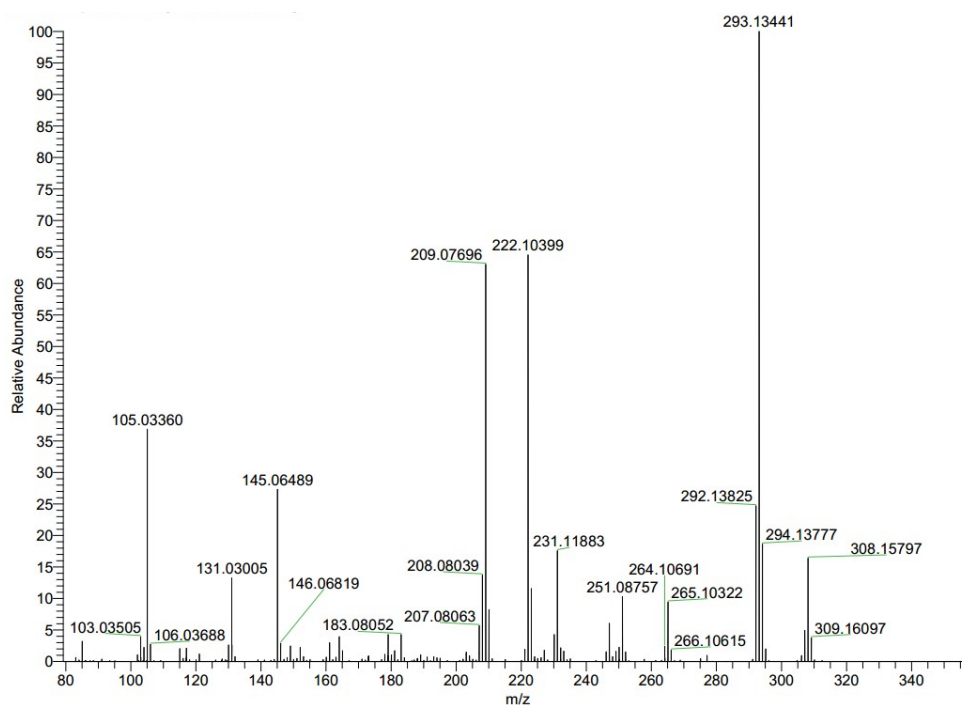

**Figure S1** High Resolution EI mass spectrum of BP4Bpin.

**Phenyl(2-(4,4,5,5-tetramethyl-1,3,2-dioxaborolan-2-yl)phenyl)methanone (BP2Bpin)**

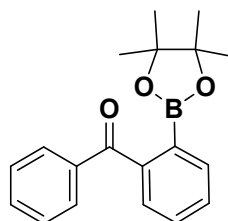

**BP2Bpin**

BP2Bpin were synthesized according to the similar experimental procedures of BP4Bpin. A white powder was achieved. Yield: 1.58 g, yield: 66.9%.  $^1\text{H}$  NMR (500 MHz,  $\text{CDCl}_3$ , 298 K), (TMS, ppm):  $\delta$  = 7.78 (d,  $J$  = 8.37 Hz, 2H), 7.74 (d,  $J$  = 7.39 Hz, 2H), 7.50-7.56 (m, 3H), 7.46-7.49 (m, 1H), 7.42-7.45 (t, 2H), 1.18 (s, 12H).  $^{13}\text{C}$  NMR (126 MHz,  $\text{CDCl}_3$ , 298 K), (ppm): 198.17, 143.67, 138.16, 133.82, 132.39, 130.33, 130.03, 129.71, 128.92, 128.21, 84.01, 83.51, 25.04, 24.56. High Resolution EI-MS: m/z found: 309.1656  $[\text{M}]^+$ ; calcd for  $[\text{C}_{19}\text{H}_{21}\text{BO}_3 + \text{H}^+]$ : 309.1584.

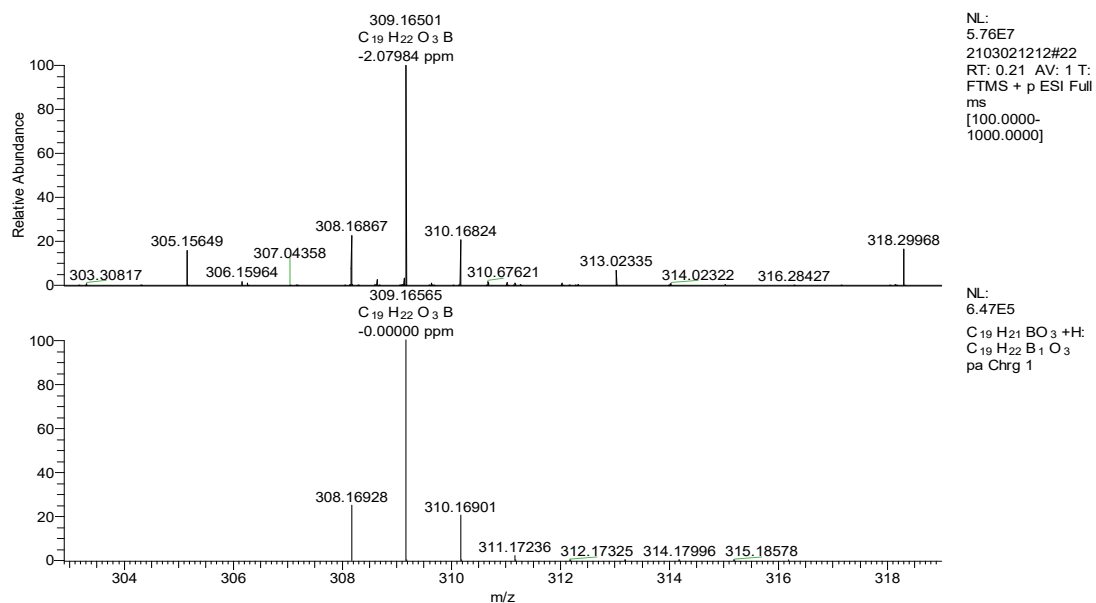

Figure S2 High Resolution ESI mass spectrum of BP2Bpin.

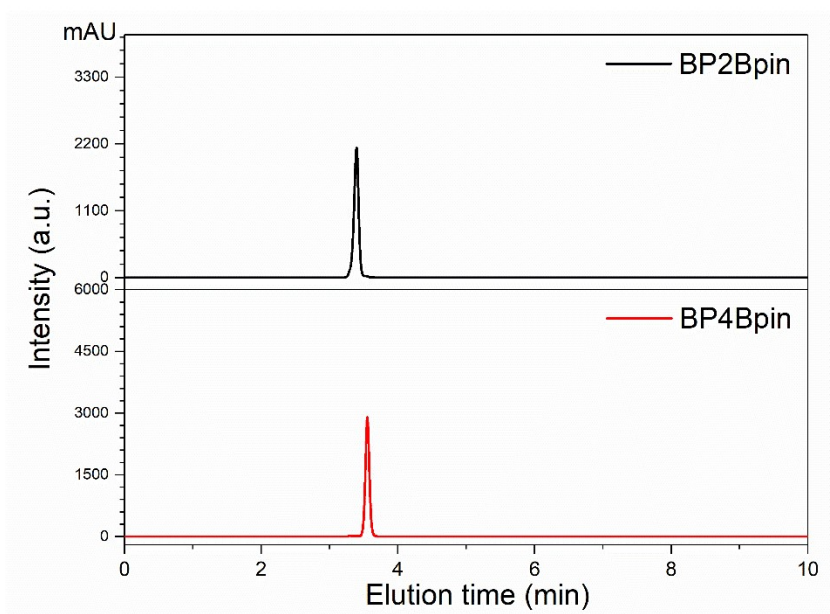

Figure S3 HPLC diagrams of BP2Bpin and BP4Bpin.

## 2 Physical measurements and instrumentations

$^1\text{H}$  NMR spectra were performed with on a Bruker AVANCE NEO 500 Nuclear Magnetic Resonance Spectrometer ((500 MHz)) in  $\text{CDCl}_3$  using tetramethylsilane (TMS) as the internal standard. High Resolution EI mass spectra were collected from a MAT95XP-HRM spectrometer.

High performance liquid chromatography (HPLC) was performed on an UltiMate 3000. The UV-visible absorption spectra of solutions were performed on Hitachi U-3900. The steady emission and afterglow emission were measured by a Shimadzu RF-5301 PC spectrometer or an Ocean Optics Maya Pro2000 with 310 nm and 365nm Rhinospectrum RhinoLED as the excitation source. Fluorescence and phosphorescence decay curves were tested on a Hamamatsu compact fluorescence lifetime spectrometer (FLS-1000). Wide-angle XRD measurements were performed at 298 K using an X-ray diffractometer (Bruker, D8 Advance). Variable temperature test system was built by ourselves. Single-crystal analyses of *n*-BP4Bpin, *c*-BP4Bpin and BP2Bpin were determined using Bruker D8 Quest X-ray Single Crystal Diffractometer with a (Cu) X-ray source.

### 3 Theoretical calculations

Molecular geometries were extracted in single crystals and performed by Gaussian 09W program package with time-dependent density functional theory (TD-DFT) with Beck's three-parameter hybrid exchange functional<sup>1</sup> and Lee, and Yang and Parr correlation functional<sup>2</sup> (B3LYP) with 6-311G\* basic set. Natural transition orbital (NTO) analysis was extracted based on TD-DFT results and visualized via Gaussview (6.0.16). Spin-orbital couplings (SOC) matrix elements were calculated via ORCA (program version 4.2.1) based on B3LYP/G 6-311G\*. Non-covalent interactions (NCI) of intramolecular and intermolecular interactions analyses were carried out by Multiwfn<sup>3</sup> with reduced density gradient (RDG) and independent gradient model (IGM), respectively.<sup>4, 5</sup> Electrostatic potential (ESP) analysis on the basis of the single crystal geometry were performed with the Multiwfn 3.7. The ESP and NCI results were rendered via Visual Molecular Dynamics (VMD) software (version 1.9.3).<sup>6</sup>

### Single-crystal data of BP2Bpin, *n*-BP4Bpin and *c*-BP4Bpin

Single-crystal data of BP2Bpin, *n*-BP4Bpin and *c*-BP4Bpin were collected by a Bruker D8 Quest X-ray Single Crystal Diffractometer with a (Cu) X-ray source. The single-crystal structures were solved by Olex2 (program version 1.3) and expanded using Fourier techniques. All non-H atoms of the compounds were refined with anisotropic thermal parameters. The hydrogen atoms were added in idealized positions and refined with fixed geometry according to their carrier atoms. CCDC numbers of the single-crystal structure of BP2Bpin, *n*-BP4Bpin and *c*-BP4Bpin are 2071524, 2071525 and 2071526, respectively.

**Crystal data for BP2Bpin:** C<sub>19</sub>H<sub>21</sub>BO<sub>3</sub> (M = 308.17 g/mol), monoclinic, space group P2<sub>1</sub>/c, a = 8.6701(3) Å, b = 9.2394(3) Å, c = 21.0354(6) Å, α=90°, β = 101.4810(10)°, γ=90°, V = 1651.36(9) Å<sup>3</sup>, Z = 4, T = 275(6) K, μ(CuKα) = 1.54178 mm<sup>-1</sup>, ρ<sub>c</sub> = 1.240 g/cm<sup>3</sup>, Reflections collected 18436, Independent reflections 3336 unique [R<sub>int</sub> = 0.0248, R<sub>sigma</sub> = 0.0177]. R<sub>1</sub> = 0.0379 (I > 2σ(I)) and wR<sub>2</sub> = 0.1019 (all data). GOF = 1.036.

**Crystal data for *n*-BP4Bpin:** C<sub>19</sub>H<sub>21</sub>BO<sub>3</sub> (M = 308.17 g/mol), monoclinic, space group P2<sub>1</sub>/n, a = 6.20100(10) Å, b = 10.5943(2) Å, c = 25.4359(5) Å, α=90°, β = 92.0660(10)°, γ=90°, V = 1669.93(5) Å<sup>3</sup>, Z = 4, T = 150.0 K, μ(CuKα) = 1.54178 mm<sup>-1</sup>, ρ<sub>c</sub> = 1.226 g/cm<sup>3</sup>, Reflections collected 23678, Independent reflections 3399 unique [R<sub>int</sub> = 0.1178, R<sub>sigma</sub> = 0.0467]. R<sub>1</sub> = 0.0403 (I > 2σ(I)) and wR<sub>2</sub> = 0.1076 (all data). GOF = 1.049.

**Crystal data for *c*-BP4Bpin:** C<sub>19</sub>H<sub>21</sub>BO<sub>3</sub> (M = 308.17 g/mol), monoclinic, space group P2<sub>1</sub>/c, a = 12.3412(3) Å, b = 11.8434(3) Å, c = 12.7459(3) Å, α=90°, β = 112.491(2)°, γ=90°, V = 1721.27(8) Å<sup>3</sup>, Z = 4, T = 150.0 K, μ(CuKα) = 1.54178 mm<sup>-1</sup>, ρ<sub>c</sub> = 1.189 g/cm<sup>3</sup>, Reflections collected 15000, Independent reflections 3496 unique [R<sub>int</sub> = 0.0301, R<sub>sigma</sub> = 0.0223]. R<sub>1</sub> = 0.0705 (I > 2σ(I)) and wR<sub>2</sub> = 0.1957 (all data). GOF = 1.081.

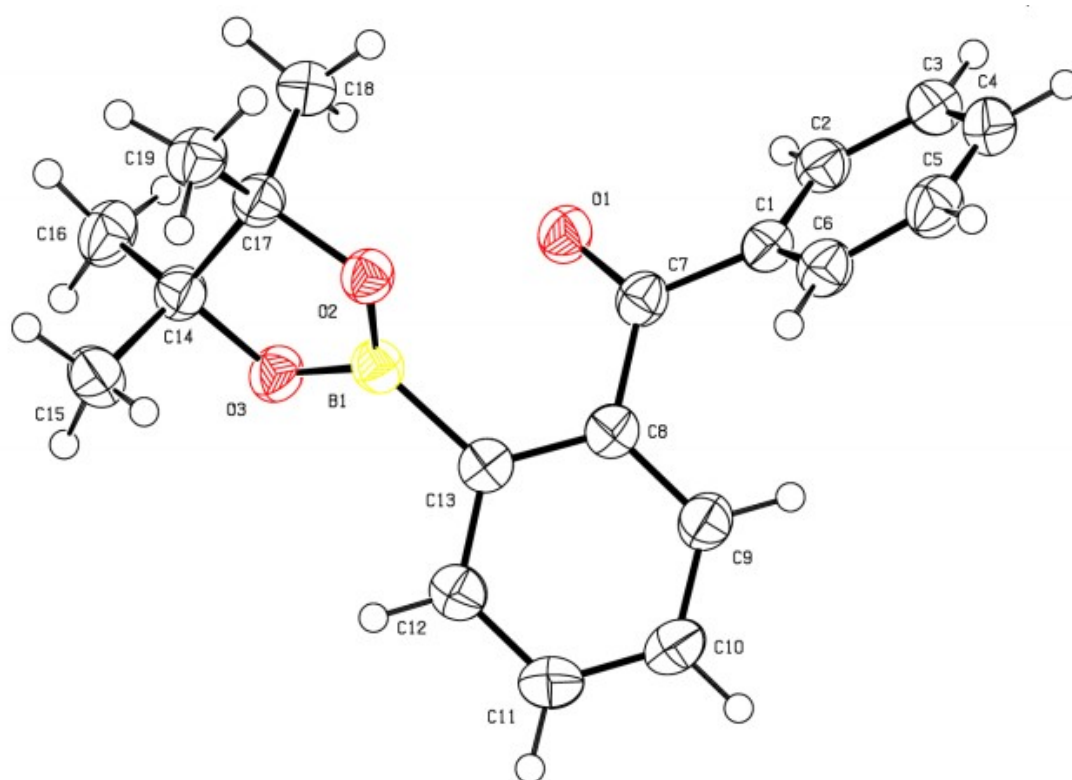

Figure S4 Single crystal structure for BP2Bpin.



**Table S1** Bond distance (Å) for BP2Bpin

| <b>Atom</b> | <b>Atom</b> | <b>Length/Å</b> | <b>Atom</b> | <b>Atom</b> | <b>Length/Å</b> |
|-------------|-------------|-----------------|-------------|-------------|-----------------|
| O2          | C17         | 1.4630(13)      | C2          | C3          | 1.3878(17)      |
| O2          | B1          | 1.3673(15)      | C17         | C19         | 1.5169(16)      |
| O3          | C14         | 1.4660(13)      | C17         | C14         | 1.5587(16)      |
| O3          | B1          | 1.3663(15)      | C17         | C18         | 1.5226(16)      |
| O1          | C7          | 1.2237(13)      | C11         | C12         | 1.3893(17)      |
| C13         | C8          | 1.4053(16)      | C11         | C10         | 1.3840(18)      |
| C13         | C12         | 1.3954(16)      | C9          | C10         | 1.3856(18)      |
| C13         | B1          | 1.5726(16)      | C6          | C5          | 1.3845(18)      |
| C1          | C7          | 1.4941(16)      | C14         | C16         | 1.5137(17)      |
| C1          | C2          | 1.3925(16)      | C14         | C15         | 1.5202(17)      |
| C1          | C6          | 1.3949(16)      | C3          | C4          | 1.3855(19)      |
| C8          | C7          | 1.4908(15)      | C5          | C4          | 1.3868(19)      |
| C8          | C9          | 1.3931(16)      |             |             |                 |

**Table S2.** Bond Angles for BP2Bpin

| Atom | Atom | Atom | Angle/°    | Atom | Atom | Atom | Angle/°    |
|------|------|------|------------|------|------|------|------------|
| B1   | O2   | C17  | 106.87(9)  | C19  | C17  | C18  | 110.38(10) |
| B1   | O3   | C14  | 106.65(9)  | C18  | C17  | C14  | 113.28(10) |
| C8   | C13  | B1   | 122.34(10) | C10  | C11  | C12  | 119.67(11) |
| C12  | C13  | C8   | 117.78(10) | C11  | C12  | C13  | 121.62(11) |
| C12  | C13  | B1   | 119.88(10) | C10  | C9   | C8   | 120.17(11) |
| C2   | C1   | C7   | 118.26(10) | C5   | C6   | C1   | 119.89(11) |
| C2   | C1   | C6   | 119.74(11) | O3   | C14  | C17  | 102.42(8)  |
| C6   | C1   | C7   | 121.84(10) | O3   | C14  | C16  | 108.29(9)  |
| C13  | C8   | C7   | 118.28(10) | O3   | C14  | C15  | 106.50(9)  |
| C9   | C8   | C13  | 120.66(10) | C16  | C14  | C17  | 115.02(10) |
| C9   | C8   | C7   | 120.44(10) | C16  | C14  | C15  | 110.63(10) |
| O1   | C7   | C1   | 119.83(10) | C15  | C14  | C17  | 113.18(10) |
| O1   | C7   | C8   | 119.76(10) | C4   | C3   | C2   | 120.29(11) |
| C8   | C7   | C1   | 120.38(9)  | C11  | C10  | C9   | 120.08(11) |
| C3   | C2   | C1   | 119.86(11) | C6   | C5   | C4   | 120.32(12) |
| O2   | C17  | C19  | 108.52(9)  | C3   | C4   | C5   | 119.85(11) |
| O2   | C17  | C14  | 101.96(8)  | O2   | B1   | C13  | 123.51(10) |
| O2   | C17  | C18  | 107.04(9)  | O3   | B1   | O2   | 113.65(10) |
| C19  | C17  | C14  | 114.93(9)  | O3   | B1   | C13  | 122.25(10) |

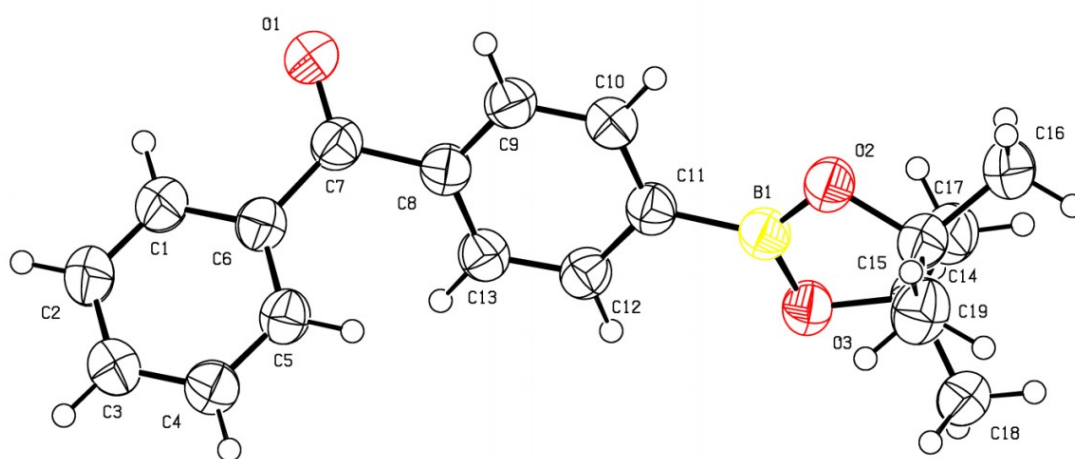

Figure S5 Single crystal structure for *n*-BP4Bpin.

**Table S3** Bond distance (Å) for *n*-BP4Bpin

| Atom | Atom | Length/Å   | Atom | Atom | Length/Å   |
|------|------|------------|------|------|------------|
| O2   | C15  | 1.4640(13) | C12  | C11  | 1.4029(16) |
| O2   | B1   | 1.3666(16) | C12  | C13  | 1.3858(16) |
| O3   | B1   | 1.3626(16) | C8   | C13  | 1.3963(16) |
| O3   | C14  | 1.4665(13) | C11  | B1   | 1.5591(16) |
| O1   | C7   | 1.2209(15) | C6   | C1   | 1.3948(16) |
| C5   | C4   | 1.3858(17) | C17  | C15  | 1.5216(17) |
| C5   | C6   | 1.3931(17) | C3   | C2   | 1.386(2)   |
| C9   | C10  | 1.3850(16) | C16  | C15  | 1.5178(16) |
| C9   | C8   | 1.3998(15) | C15  | C14  | 1.5535(17) |
| C4   | C3   | 1.3756(18) | C2   | C1   | 1.3841(19) |
| C7   | C8   | 1.4983(15) | C14  | C19  | 1.5201(19) |
| C7   | C6   | 1.4943(17) | C14  | C18  | 1.5190(18) |
| C10  | C11  | 1.3997(16) |      |      |            |

**Table S4.** Bond Angles for *n*-BP4Bpin

| Atom | Atom | Atom | Angle/°    | Atom | Atom | Atom | Angle/°    |
|------|------|------|------------|------|------|------|------------|
| B1   | O2   | C15  | 106.10(9)  | C12  | C13  | C8   | 120.37(10) |
| B1   | O3   | C14  | 106.33(9)  | C4   | C3   | C2   | 119.57(12) |
| C4   | C5   | C6   | 121.00(11) | O2   | C15  | C17  | 106.46(10) |
| C10  | C9   | C8   | 119.80(10) | O2   | C15  | C16  | 109.00(10) |
| C3   | C4   | C5   | 120.02(11) | O2   | C15  | C14  | 102.25(9)  |
| O1   | C7   | C8   | 119.47(11) | C17  | C15  | C14  | 113.41(11) |
| O1   | C7   | C6   | 120.64(11) | C16  | C15  | C17  | 110.44(11) |
| C6   | C7   | C8   | 119.87(10) | C16  | C15  | C14  | 114.56(11) |
| C9   | C10  | C11  | 121.52(10) | C1   | C2   | C3   | 120.84(12) |
| C13  | C12  | C11  | 120.92(11) | C2   | C1   | C6   | 119.97(12) |
| C9   | C8   | C7   | 122.37(10) | O2   | B1   | C11  | 122.69(11) |
| C13  | C8   | C9   | 119.36(10) | O3   | B1   | O2   | 114.14(10) |
| C13  | C8   | C7   | 118.25(10) | O3   | B1   | C11  | 123.16(11) |
| C10  | C11  | C12  | 118.01(10) | O3   | C14  | C15  | 102.06(9)  |
| C10  | C11  | B1   | 120.28(10) | O3   | C14  | C19  | 106.43(10) |
| C12  | C11  | B1   | 121.70(10) | O3   | C14  | C18  | 108.82(10) |
| C5   | C6   | C7   | 122.27(10) | C19  | C14  | C15  | 113.61(11) |
| C5   | C6   | C1   | 118.60(11) | C18  | C14  | C15  | 115.14(11) |
| C1   | C6   | C7   | 119.03(11) | C18  | C14  | C19  | 110.03(12) |

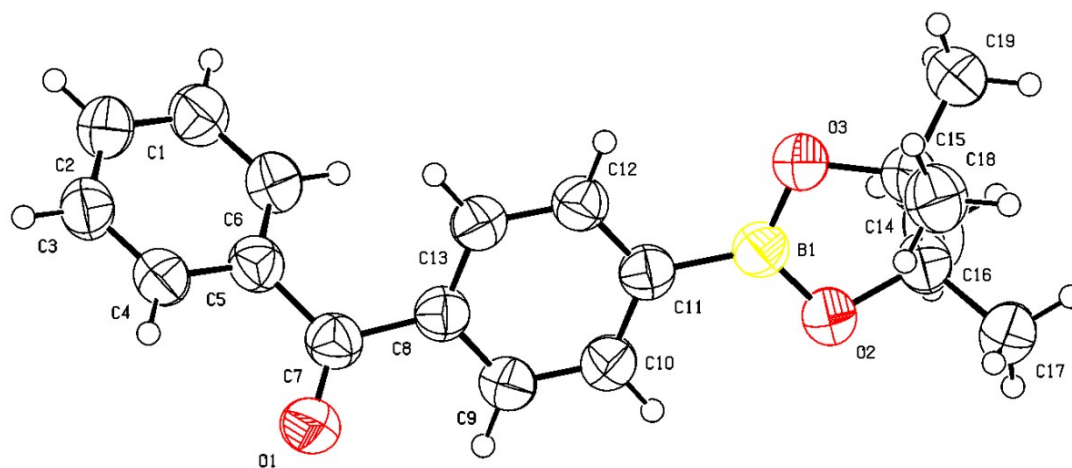

Figure S6 Single crystal structure for *c*-BP4Bpin.

**Table S5** Bond distance (Å) for *c*-BP4Bpin

| Atom | Atom | Length/Å | Atom | Atom | Length/Å |
|------|------|----------|------|------|----------|
| O3   | C15  | 1.463(2) | C8   | C9   | 1.394(3) |
| O3   | B1   | 1.356(3) | C8   | C7   | 1.501(2) |
| O2   | B1   | 1.366(2) | C7   | C5   | 1.491(3) |
| O2   | C14  | 1.466(2) | C5   | C6   | 1.393(3) |
| O1   | C7   | 1.220(2) | C3   | C2   | 1.387(3) |
| C11  | C10  | 1.402(3) | C6   | C1   | 1.381(3) |
| C11  | C12  | 1.398(3) | C15  | C19  | 1.516(3) |
| C11  | B1   | 1.560(3) | C15  | C18  | 1.518(3) |
| C10  | C9   | 1.384(3) | C15  | C14  | 1.560(3) |
| C13  | C12  | 1.388(3) | C1   | C2   | 1.386(3) |
| C13  | C8   | 1.391(3) | C16  | C14  | 1.514(3) |
| C4   | C5   | 1.400(3) | C17  | C14  | 1.514(3) |
| C4   | C3   | 1.380(3) |      |      |          |

**Table S6.** Bond Angles for *c*-BP4Bpin

| Atom | Atom | Atom | Angle/°    | Atom | Atom | Atom | Angle/°    |
|------|------|------|------------|------|------|------|------------|
| B1   | O3   | C15  | 107.36(15) | C4   | C3   | C2   | 120.22(18) |
| B1   | O2   | C14  | 106.76(14) | C1   | C6   | C5   | 120.09(18) |
| C10  | C11  | B1   | 121.29(16) | O3   | C15  | C19  | 108.82(16) |
| C12  | C11  | C10  | 118.01(16) | O3   | C15  | C18  | 105.86(17) |
| C12  | C11  | B1   | 120.70(16) | O3   | C15  | C14  | 102.28(14) |
| C9   | C10  | C11  | 121.07(17) | C19  | C15  | C18  | 109.74(19) |
| C12  | C13  | C8   | 120.20(17) | C19  | C15  | C14  | 115.5(2)   |
| C13  | C12  | C11  | 121.09(17) | C18  | C15  | C14  | 113.82(18) |
| C3   | C4   | C5   | 119.99(18) | C6   | C1   | C2   | 120.21(19) |
| C13  | C8   | C9   | 119.40(16) | C1   | C2   | C3   | 120.01(19) |
| C13  | C8   | C7   | 122.13(16) | O3   | B1   | O2   | 113.92(16) |
| C9   | C8   | C7   | 118.43(16) | O3   | B1   | C11  | 123.26(18) |
| C10  | C9   | C8   | 120.22(17) | O2   | B1   | C11  | 122.82(17) |
| O1   | C7   | C8   | 119.82(17) | O2   | C14  | C15  | 102.42(15) |
| O1   | C7   | C5   | 120.55(17) | O2   | C14  | C16  | 105.83(16) |
| C5   | C7   | C8   | 119.63(15) | O2   | C14  | C17  | 108.93(16) |
| C4   | C5   | C7   | 118.46(17) | C16  | C14  | C15  | 113.19(19) |
| C6   | C5   | C4   | 119.46(17) | C17  | C14  | C15  | 114.61(17) |
| C6   | C5   | C7   | 122.00(16) | C17  | C14  | C16  | 111.0(2)   |

## Photophysical data and spectra

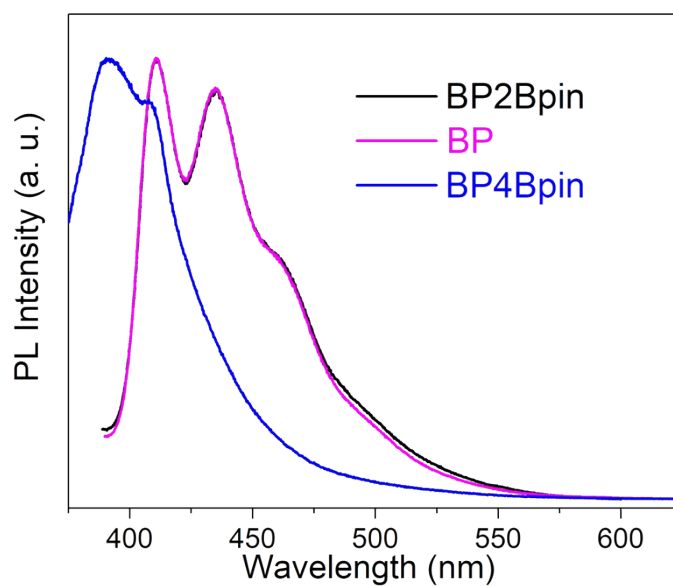

Figure S7 Fluorescence spectra ( $\lambda_{\text{ex}} = 365 \text{ nm}$ ) of BP, BP2Bpin and BP4Bpin in DCM solution ( $1.0 \times 10^{-5} \text{ M}$ ).

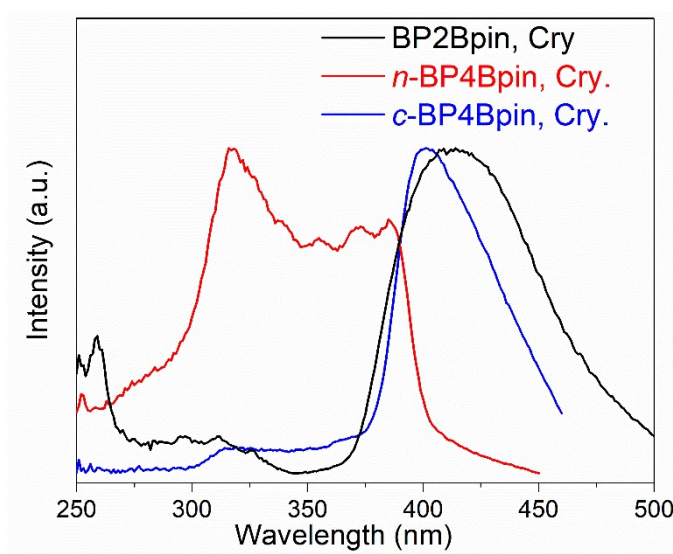

Figure S8 Normalized excitation spectra of crystalline BP2Bpin ( $\lambda_{\text{em}} = 512 \text{ nm}$ ), *n*-BP4Bpin ( $\lambda_{\text{em}} = 490 \text{ nm}$ ), and *c*-BP4Bpin ( $\lambda_{\text{em}} = 490 \text{ nm}$ ).

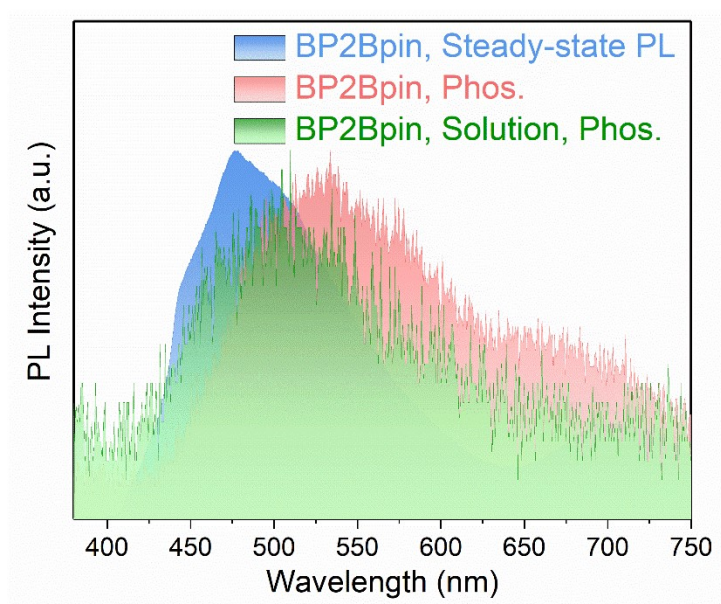

Figure S9 Steady-state PL (blue) and delayed spectra (red) of crystalline BP2Bpin at 77 K, and phosphorescence spectrum (green) of BP2Bpin in 2-MeTHF solution ( $1.0 \times 10^{-5}$  M) at 77 K.

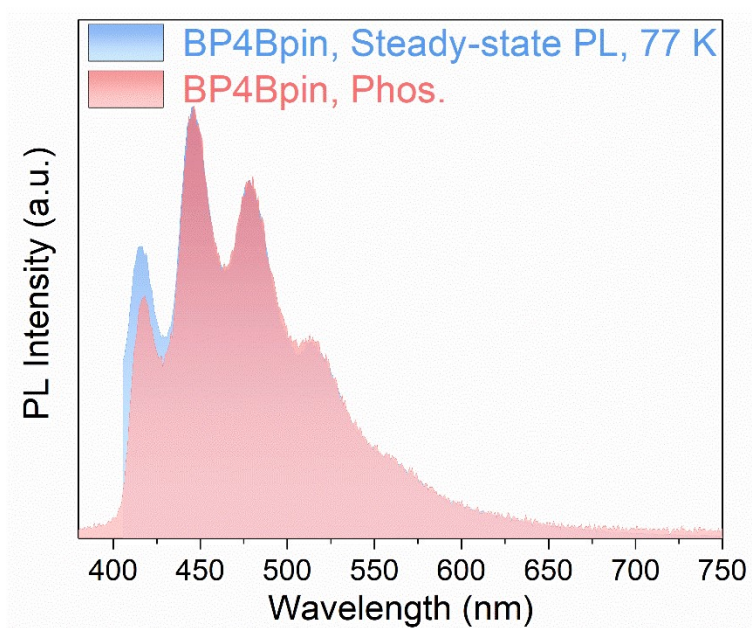

Figure S10 Steady-state PL (blue,  $\lambda_{\text{ex}} = 365$  nm) and delayed spectra (red, delay 8 ms) of BP4Bpin in 2-MeTHF solution ( $1.0 \times 10^{-5}$  M) at 77 K.



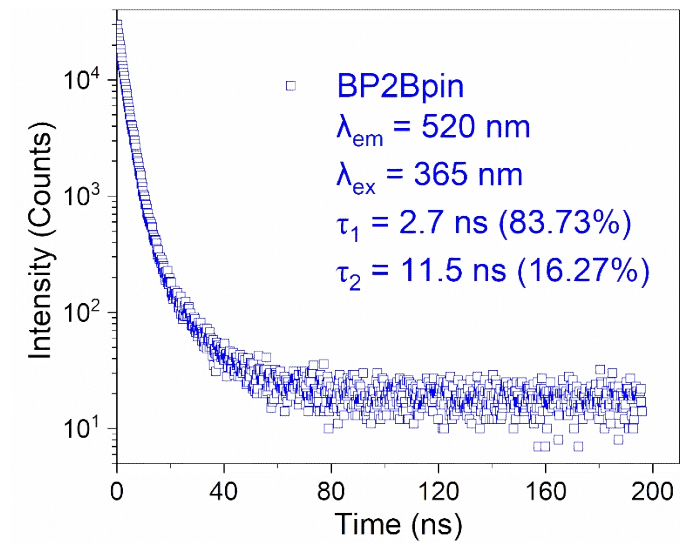

Figure S11 Time-resolved decay curves of crystalline BP2Bpin under 365 nm excitation at 300 K.

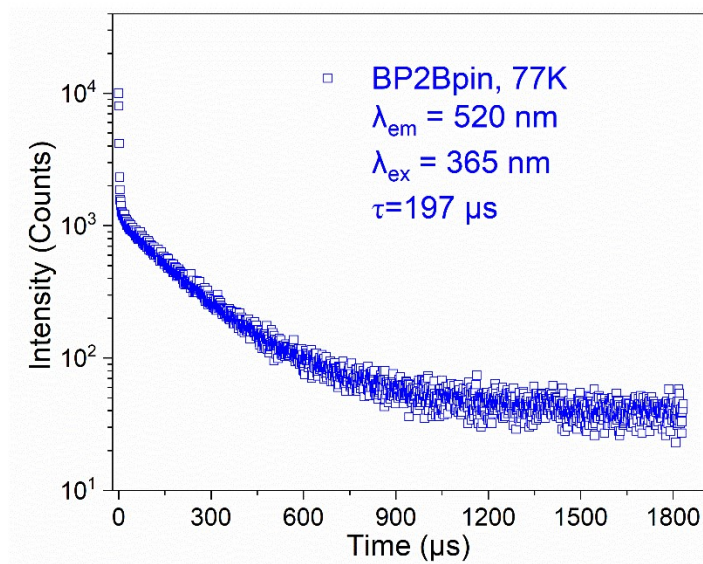

Figure S12 Time-resolved decay curves of crystalline BP2Bpin under 365 nm excitation at 77 K.

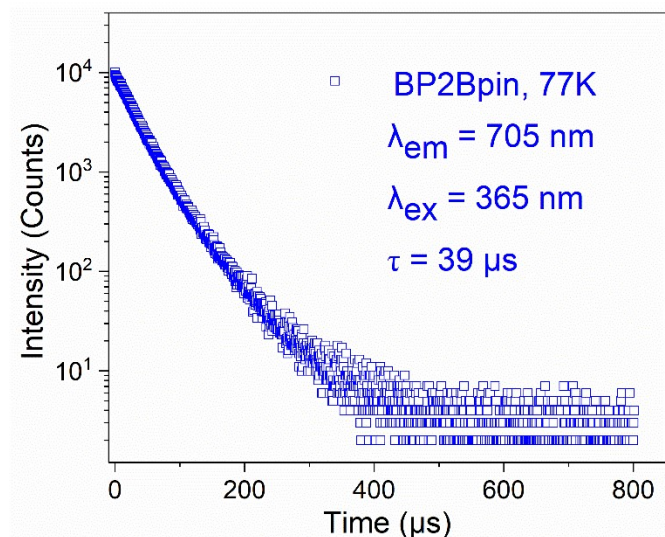

Figure S13 Time-resolved decay curves of crystalline BP2Bpin under 365 nm excitation at 77 K.

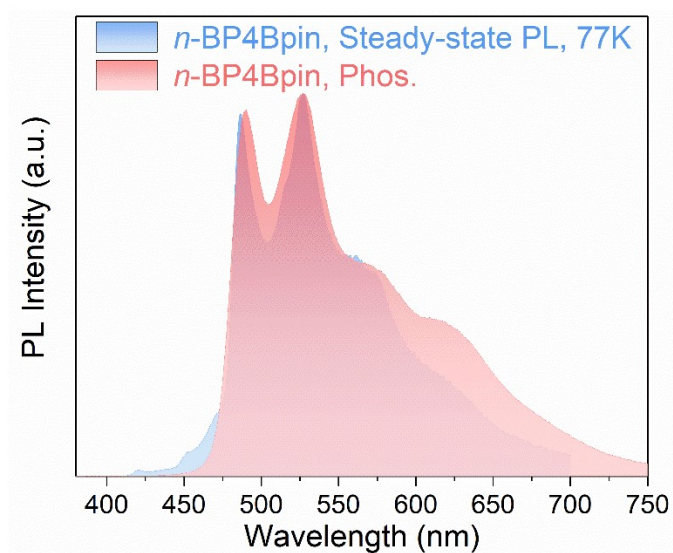

Figure S14 Steady-state PL (blue,  $\lambda_{\text{ex}} = 365 \text{ nm}$ ) and delayed spectra (red, delay 8 ms) of crystalline *n*-BP4Bpin at 77 K.

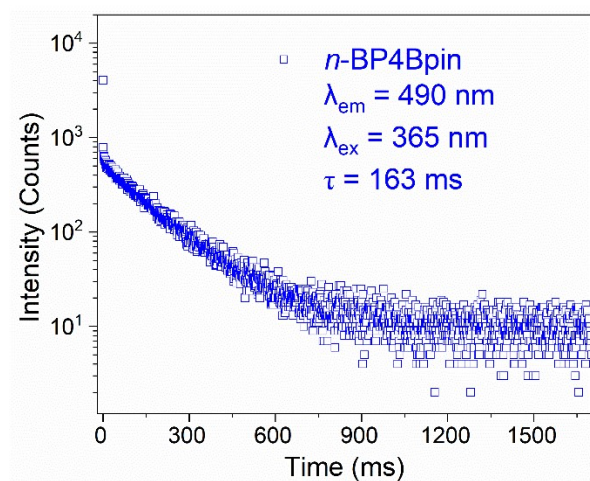

Figure S15 Time-resolved decay curves of crystalline *n*-BP4Bpin under 365 nm excitation at 77 K.

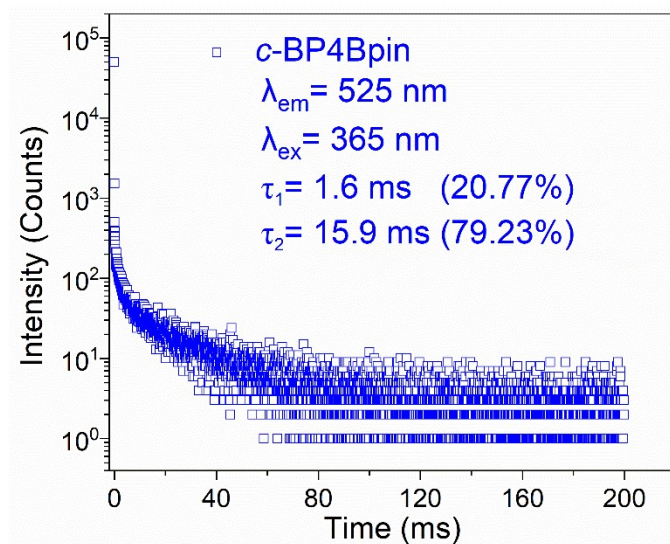

Figure S16 Time-resolved decay curves of crystalline *c*-BP4Bpin under 365 nm excitation at 300 K.

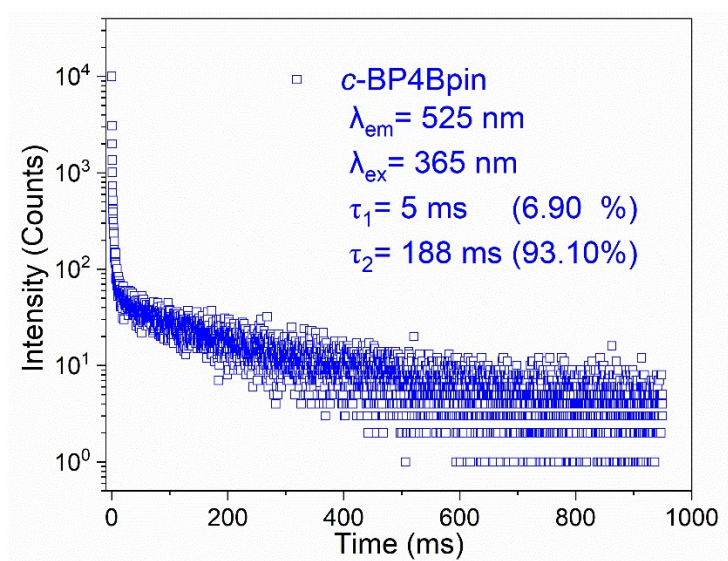

Figure S17 Time-resolved decay curves of crystalline *c*-BP4Bpin under 365 nm excitation at 77 K.

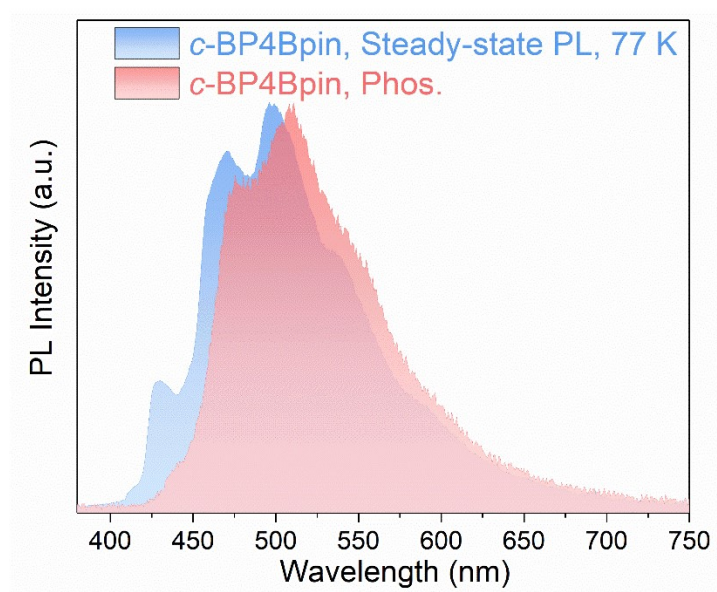

Figure S18 Steady-state PL (blue,  $\lambda_{ex} = 365 \text{ nm}$ ) and delayed spectra (red, delay 8 ms) of crystalline *c*-BP4Bpin at 77 K.



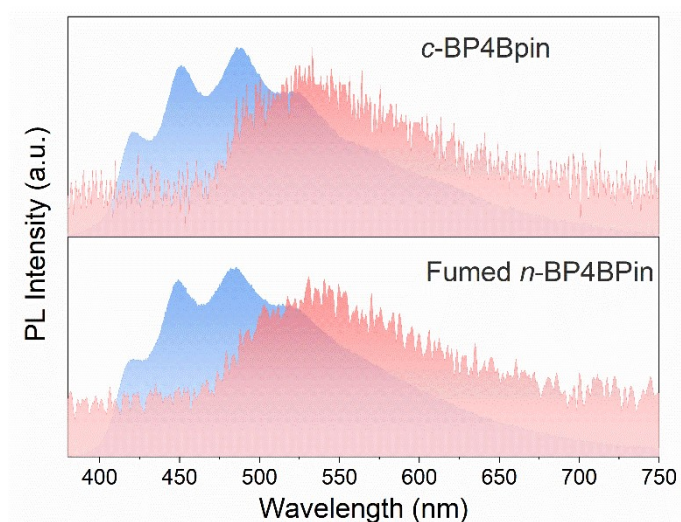

Figure S19 Steady-state PL (blue,  $\lambda_{\text{ex}} = 365 \text{ nm}$ ) and delayed spectra (red, delay 8 ms) of crystalline *c*-BP4Bpin and fumed *n*-BP4BPin.

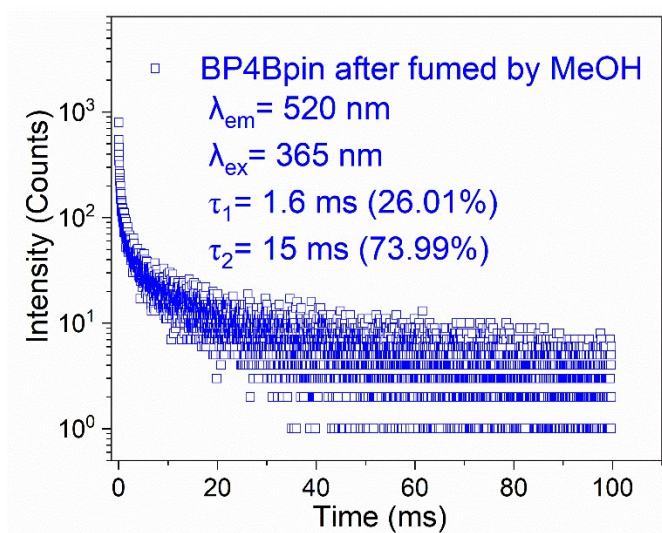

Figure S20 Time-resolved decay curves of crystalline BP4Bpin after fumed by MeOH under 365 nm excitation at 300 K.

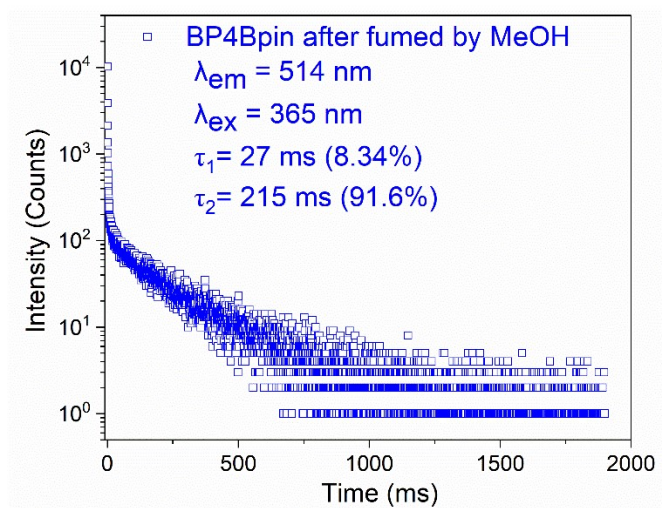

Figure S21 Time-resolved decay curves of crystalline BP4Bpin after fumed by MeOH under 365 nm excitation at 77 K.

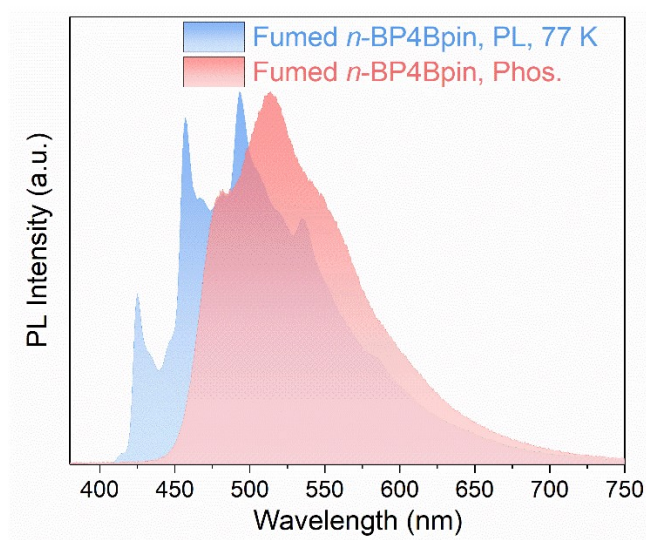

Figure S22 Steady-state PL (blue,  $\lambda_{ex} = 365 \text{ nm}$ ) and delayed spectra (red, delay 8 ms) of crystalline *n*-BP4Bpin after fumed by MeOH at 77 K.

**Table S7** The CIE coordinates of crystalline *n*-BP4Bpin under UV irradiation at different temperature.

| <b>Temperature</b> | <b>CIE <i>x</i></b> | <b>CIE <i>y</i></b> | <b>Peak</b> |
|--------------------|---------------------|---------------------|-------------|
| 25 °C              | 0.3041              | 0.4989              | 528         |
| 30 °C              | 0.3129              | 0.4808              | 528         |
| 35 °C              | 0.3004              | 0.471               | 529         |
| 40 °C              | 0.2989              | 0.4632              | 528         |
| 45 °C              | 0.3002              | 0.4537              | 528         |
| 50 °C              | 0.2905              | 0.432               | 493         |
| 55 °C              | 0.2822              | 0.4168              | 493         |
| 60 °C              | 0.2752              | 0.3883              | 493         |

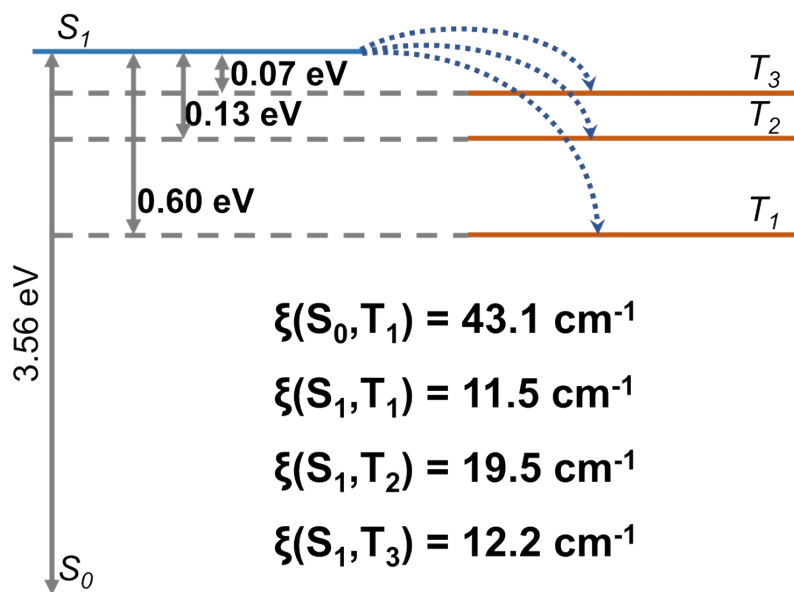

Figure S23 Theoretically-calculated energy levels and spin-orbit coupling constants between  $S_1$  and lower-lying  $T_n$  with the corresponding single crystal structure of *c*-BP4Bpin.



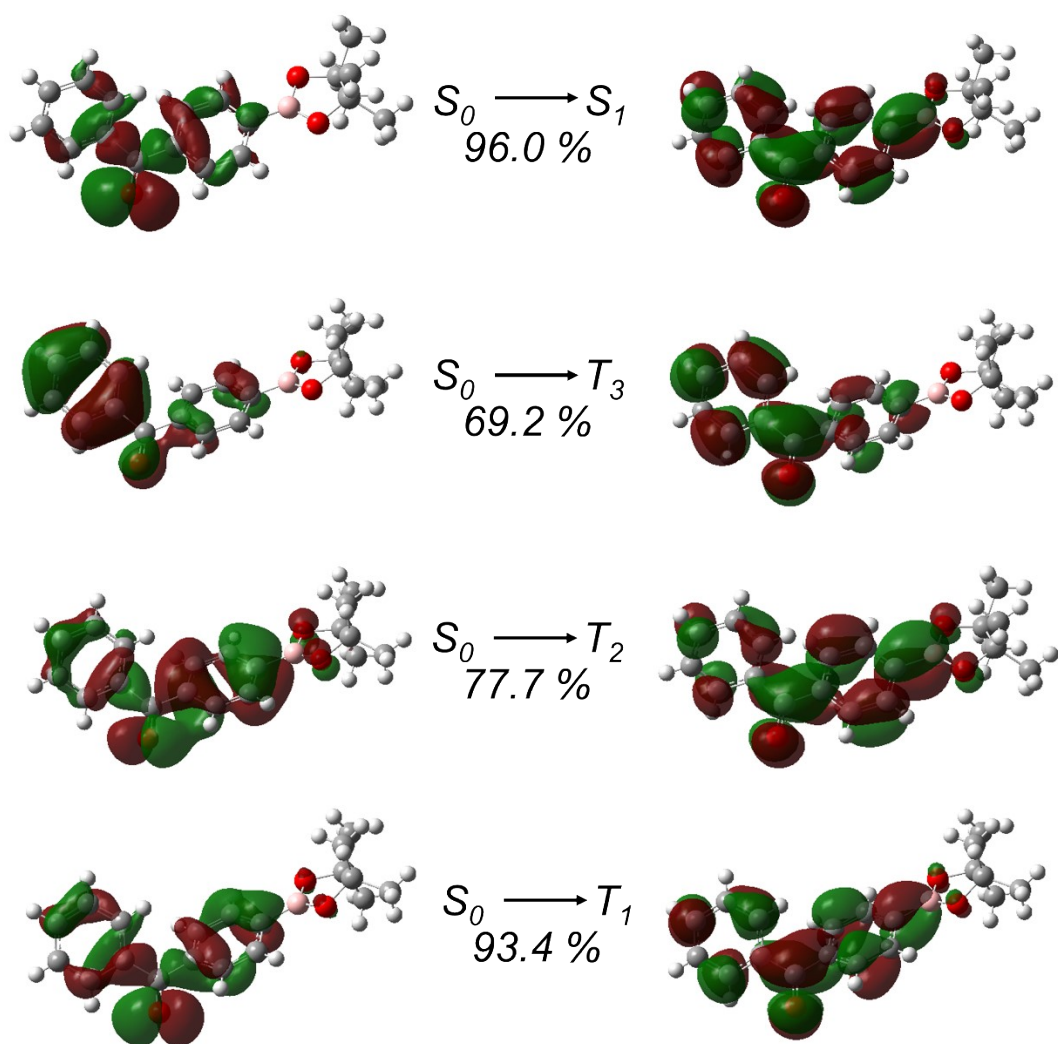

Figure S24 NTO distributions of  $S_1$ , lower-lying  $T_1$ ,  $T_2$  and  $T_3$  at crystalline geometric structure of *n*-BP4Bpin.

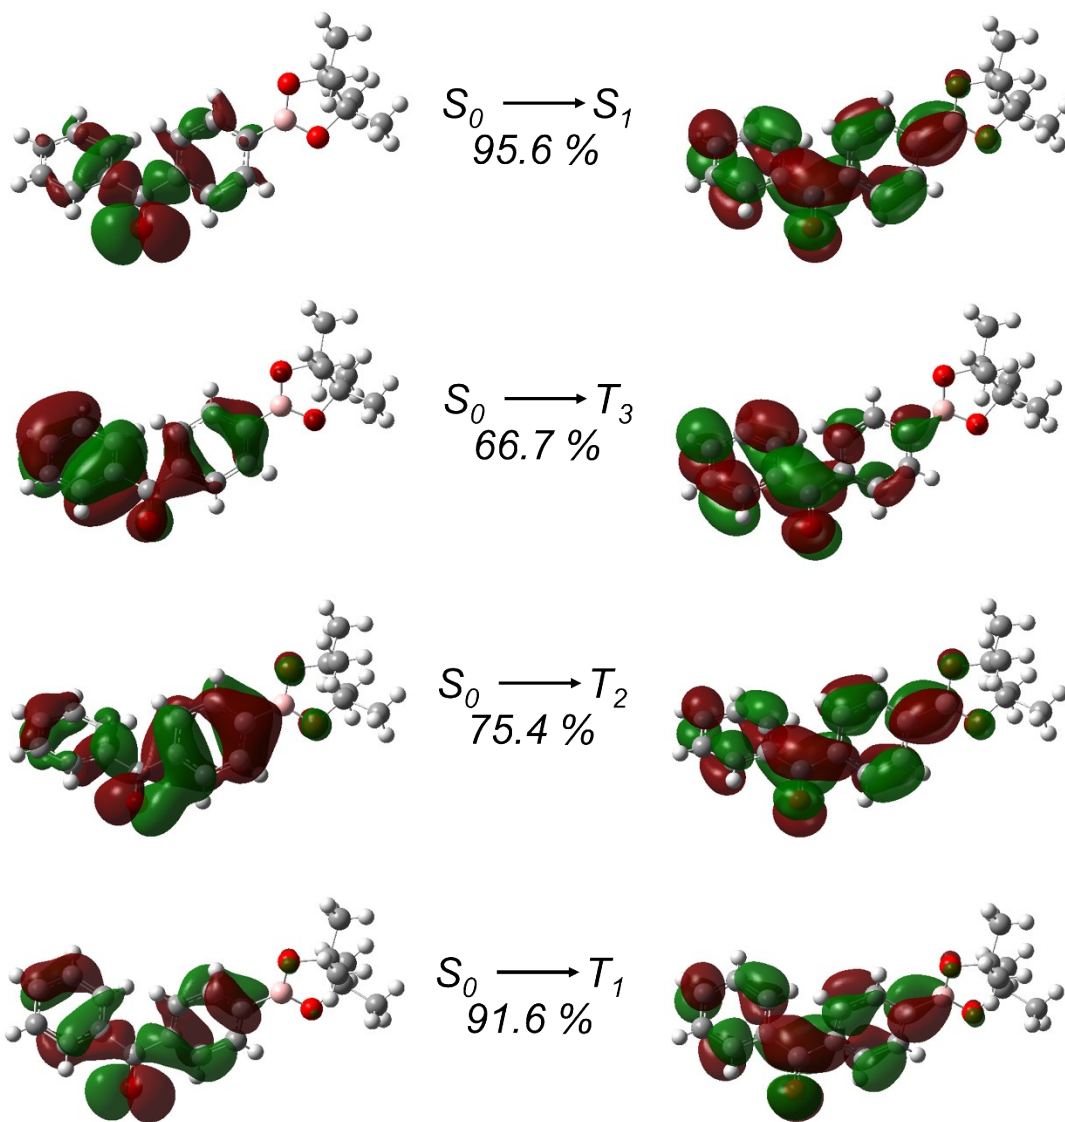

Figure S25 NTO distributions of  $S_1$ , lower-lying  $T_1$ ,  $T_2$  and  $T_3$  at crystalline geometric structure of *c*-BP4Bpin.

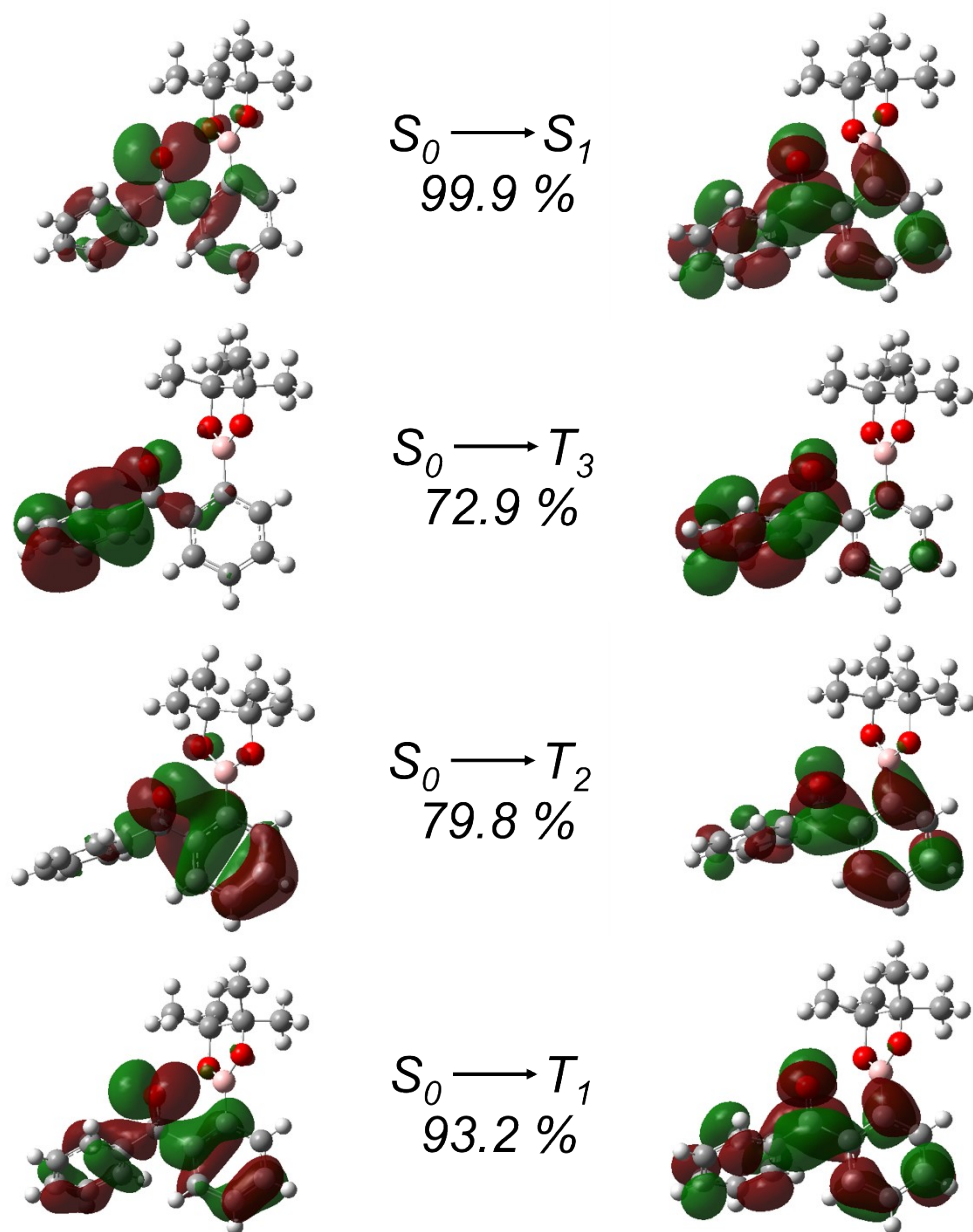

Figure S26 NTO distributions of  $S_1$ , lower-lying  $T_1$ ,  $T_2$  and  $T_3$  at crystalline geometric structure of BP2Bpin.

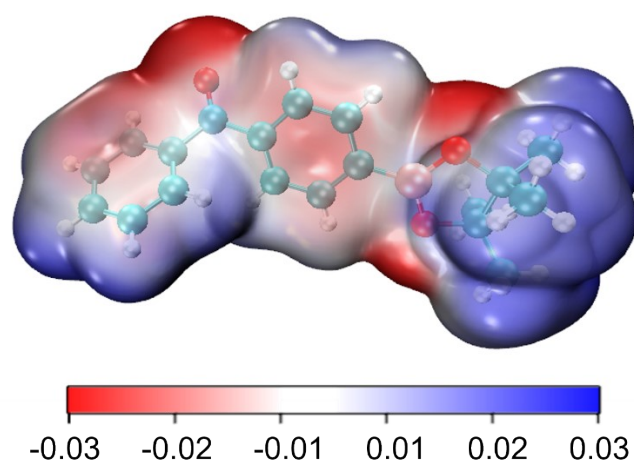

Figure S27 Electrostatic potential diagrams of *c*-BP4Bpin.

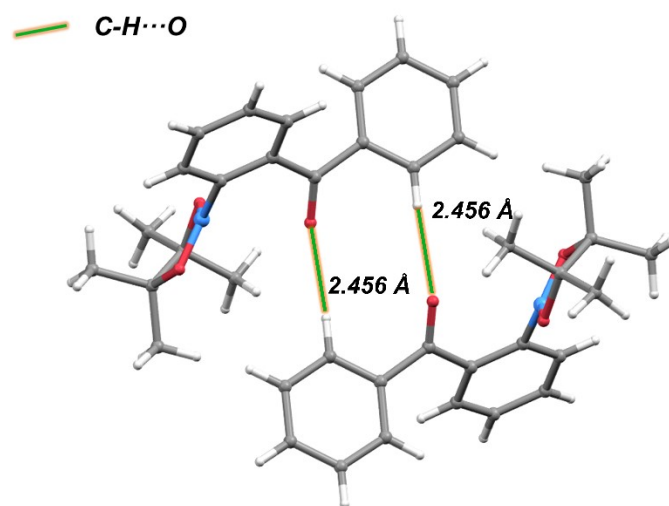

Figure S28 Single-crystal structures of BP2Bpin dimers (C-H...O intermolecular hydrogen bonds were shown).

## References

1. A. D. Becke, *J. Chem. Phys.*, 1993, **98**, 5648-5652.
2. C. Lee, W. Yang and R. G. Parr, *Phys. Rev. B*, 1988, **37**, 785-789.
3. T. Lu and F. Chen, *J. Comput. Chem.*, 2012, **33**, 580-592.
4. E. R. Johnson, S. Keinan, P. Mori-Sánchez, J. Contreras-García, A. J. Cohen and W. Yang, *J. Am. Chem. Soc.*, 2010, **132**, 6498-6506.
5. C. Lefebvre, G. Rubez, H. Khartabil, J.-C. Boisson, J. Contreras-García and E. Hénon, *PCCP*, 2017, **19**, 17928-17936.
6. W. Humphrey, A. Dalke and K. Schulten, *J. Mol. Graph.*, 1996, **14**, 33-38.
